# Supplementary material
Source: MDPI journal article supplement (https://www.mdpi.com/1999-4907/8/4/136)
Supplement: s1 [file s1]

**Table S1.** Analysis of variance (Two-Way-ANOVA) showing the interaction between cultivars (F1) and treatments (F2). DWS stands for shoot dry weight, DWR stands for root dry weight, EL% stands for electrolyte leakage, Na+S stands for sodium in the shoot, K+S stands for potassium in the shoot, Na+/K+shoot Ratio stands for shoot sodium potassium ratio, Na+R stands for sodium in the root, K+R stands for potassium in the root, Na+/K+ root Ratio stands for root sodium potassium ratio, *Ci* stands for intercellular CO2 concentration, *E* stands for transpiration rate, *gs* stands for stomatal conductance, *A* stands for photosynthetic rate, WUE stands for water use efficiency, *Qy* stands for quantum yield, LA stands for leaf area, and RWC % stands for relative water content.

| **Source** | | **Type III Sum of Squares** | **df** | **Mean Square** | **F** | **Sig.** |
| --- | --- | --- | --- | --- | --- | --- |
| F1 * F2 | DWS | 0.275 | 9 | 0.031 | 8.857 | 0.000 |
| DWR | 0.220 | 9 | 0.024 | 9.658 | 0.000 |
| EL% | 57.751 | 9 | 6.417 | 5.291 | 0.000 |
| Na+S | 299.287 | 9 | 33.254 | 19.481 | 0.000 |
| K+S | 116.169 | 9 | 12.908 | 27.945 | 0.000 |
| Na+/K+shoot Ratio | 12.355 | 9 | 1.373 | 129.185 | 0.000 |
| Na+R | 236.141 | 9 | 26.238 | 22.936 | 0.000 |
| K+R | 50.945 | 9 | 5.661 | 23.959 | 0.000 |
| Na+/K+root Ratio | 10.013 | 9 | 1.113 | 119.288 | 0.000 |
| *Ci* | 2110.813 | 9 | 234.535 | 1.008 | 0.444 |
| *E* | 3.155 | 9 | 0.351 | 22.784 | 0.000 |
| *gs* | 0.100 | 9 | 0.011 | 3.135 | 0.004 |
| *A* | 106.102 | 9 | 11.789 | 17.503 | 0.000 |
| WUE | 16610.367 | 9 | 1845.596 | 13.935 | 0.000 |
| Qy | 0.180 | 9 | 0.020 | 22.231 | 0.000 |
| LA | 63.351 | 9 | 7.039 | 8.388 | 0.000 |
| RWC% | 1299.818 | 9 | 144.424 | 3.601 | 0.001 |
|  | Chlorophyll | 1.916 | 9 | 0.213 | 0.872 | 0.555 |

**Table S2.** The Pearson's correlation coefficient (*r*) and *p*-values measured for different parameters. Na+ stands for sodium ions, DWS stands for shoot dry weight, DWR stands for root dry weight, EL stands for electrolyte leakage, *A* stands for photosynthetic rate, *gs* stands for stomatal conductance, RWC % stands for relative water content, *Chla+b*stands for chlorophyll a and b, LA stands for leaf area, WUE stands for water use efficiency,and *Ci* stands for intercellular CO2 concentration.

| **Measurement** | ***r*** | ***p-*value** |
| --- | --- | --- |
| Na * DWS | −0.866 | 0.000 |
| Na * DWR | −0.816 | 0.000 |
| Na * EL | 0.81 | 0.000 |
| *A * gs* | 0.934 | 0.000 |
| *A* * DWS | 0.879 | 0.000 |
| *A* * RWC | 0.422 | 0.060 |
| *A* * Chla+b | 0.336 | 0.034 |
| *A* * LA | 0.897 | 0.000 |
| *A* * WUE | −0.031 | 0.890 |
| LA* DW | 0.959 | 0.000 |
| LA* EL | −0.846 | 0.000 |
| LA* Chla+b | 0.284 | 0.075 |
| EL * WUE | −837 | 0.000 |
| *Ci* * *gs* | 0.729 | 0.000 |
